# Supplementary material for: Boosting supercapacitor and capacitive deionization performance of hierarchically porous carbon by polar surface and structural engineering
Source: Royal Society of Chemistry journal article supplement (doi:10.1039/c9ta12170f), 2019-12-14
Supplement: c9ta12170f1.pdf [file c9ta12170f1.pdf]

## **Supporting Information**

**Boosting supercapacitor and capacitive deionization performance of  
hierarchically porous carbon by polar surface and structural engineering**

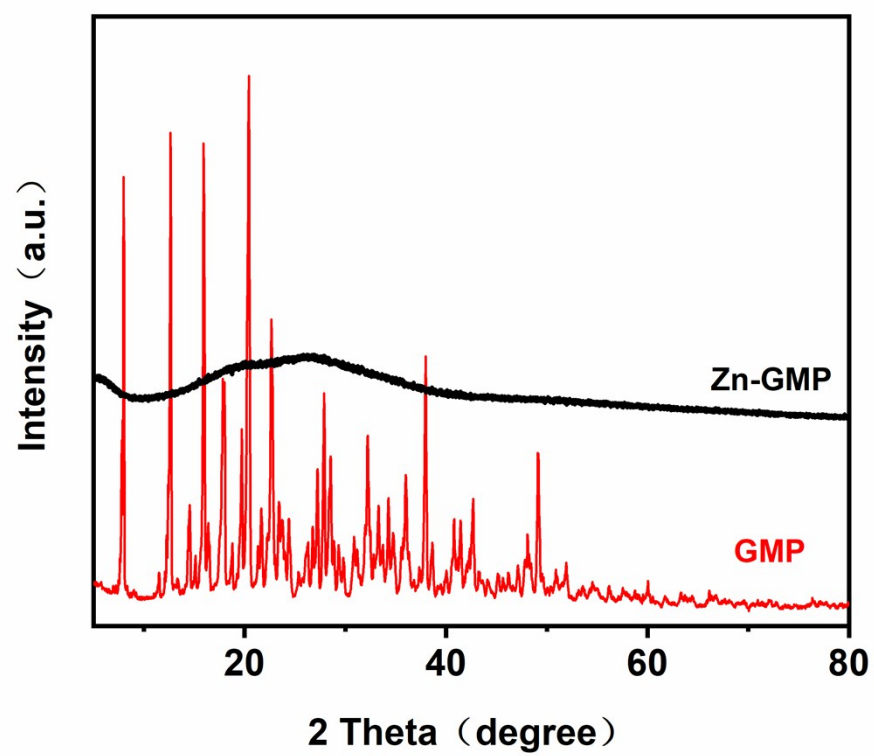

**Figure S1.** XRD patterns of GMP and Zn-GMP.

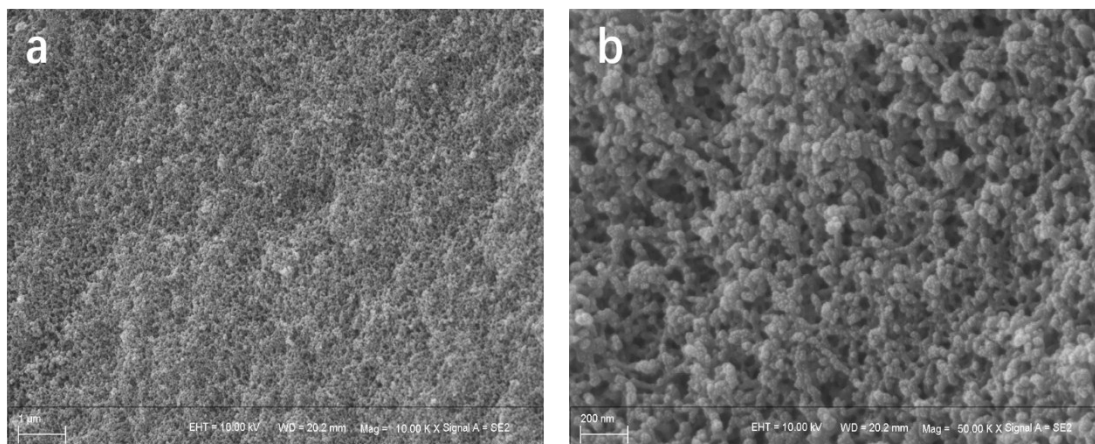

**Figure S2.** (a-b) SEM images of Zn-GMP.

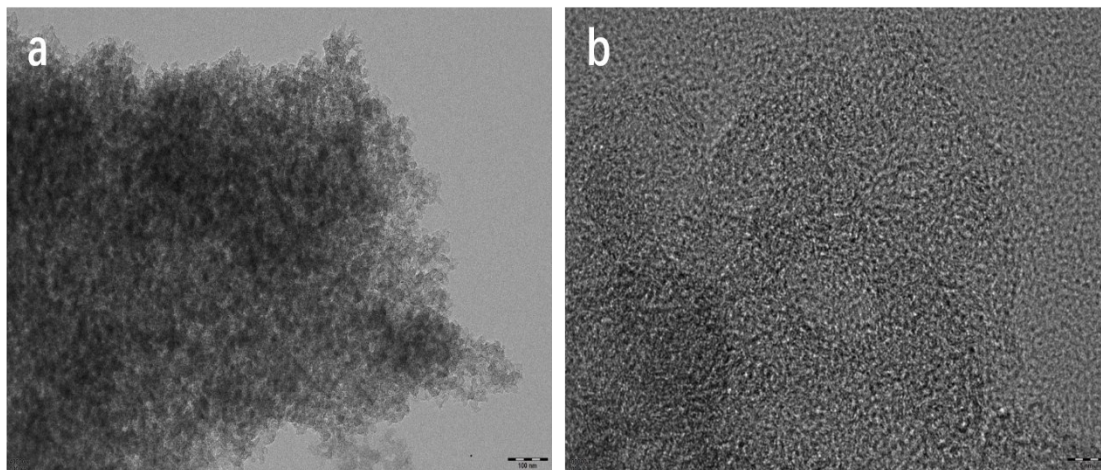

**Figure S3.** (a-b) TEM images of Zn-GMP.

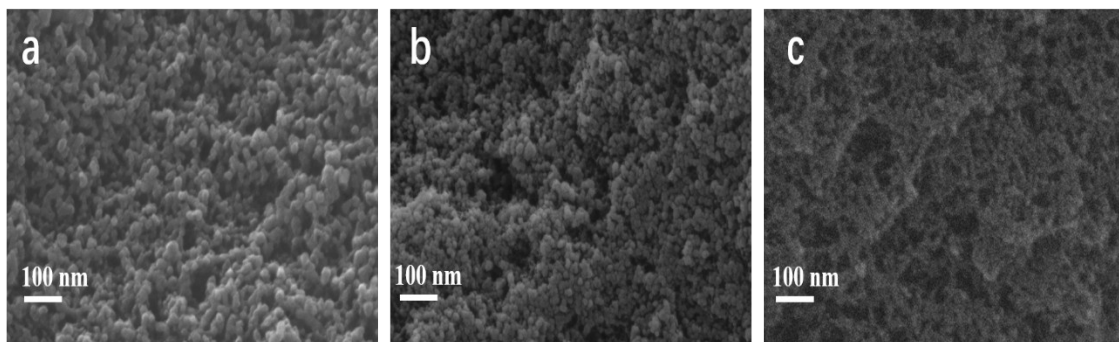

**Figure S4.** (a) SEM image of NP-HPCN-700. (b) SEM image of NP-HPCN-800. (c) SEM image of NP-HPCN-1000.

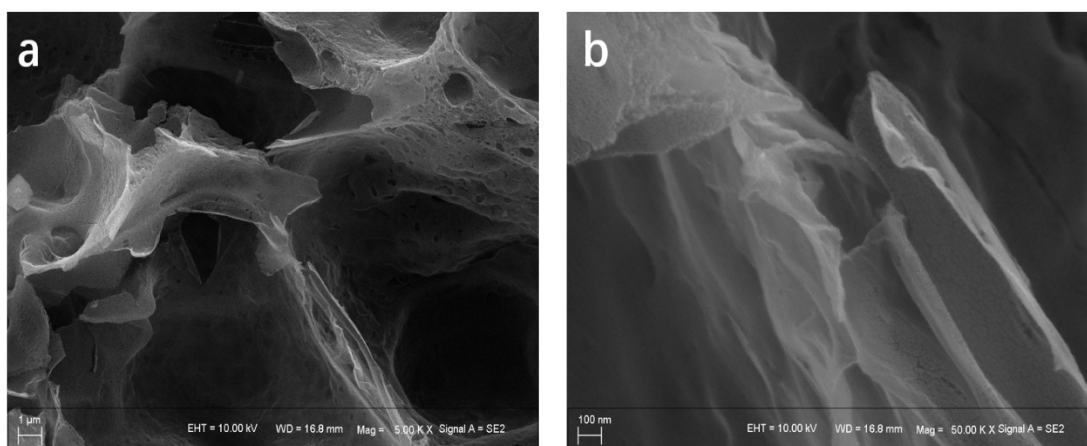

**Figure S5.** (a-b) SEM images of NP-HPC-900.

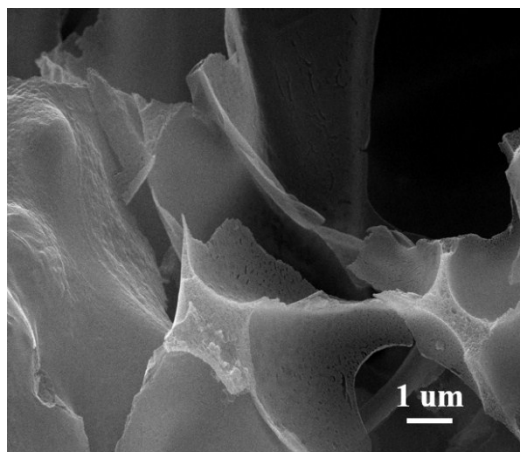

**Figure S6.** SEM image of carbons derived from the only GMP.

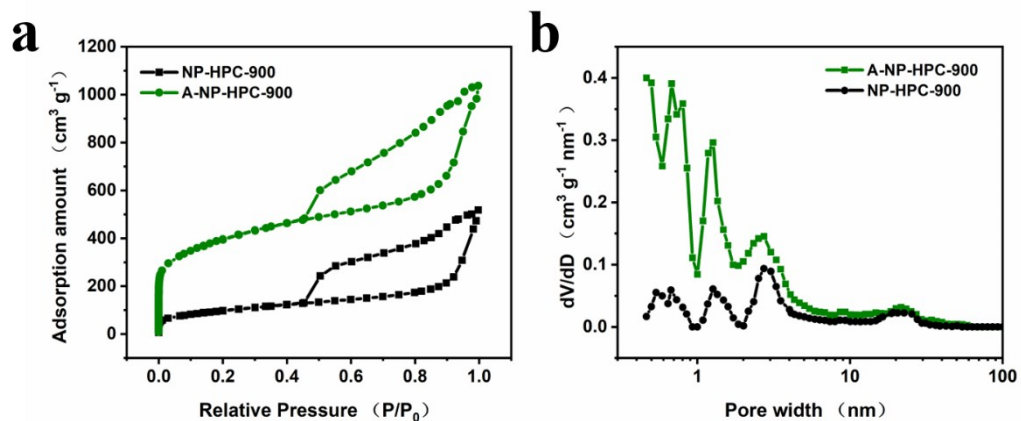

**Figure S7.** (a)  $N_2$ -adsorption/desorption isotherms. (b) the corresponding pore-size distribution curves calculated from the adsorption branch of the isotherms by: the NLDFT method.



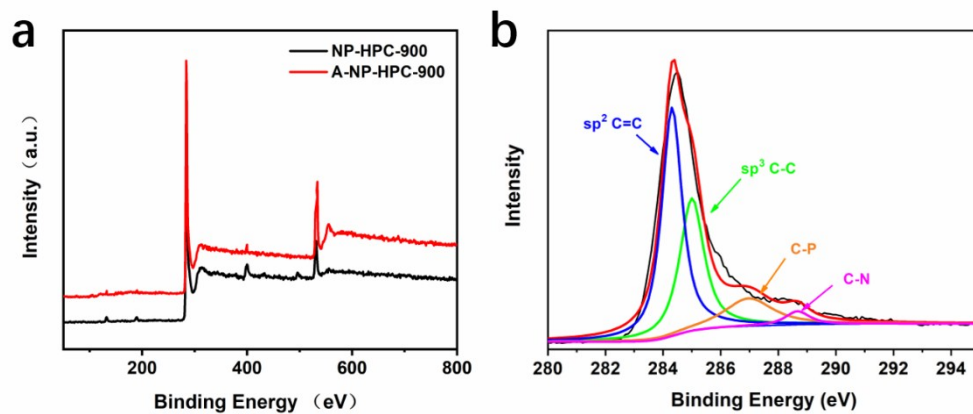

**Figure S8.** (a) Full-scale XPS spectra of NP-HPC-900 and A-NP-HPC-900. (b) high-resolution C 1s core-level XPS spectra of NP-HPC-900.

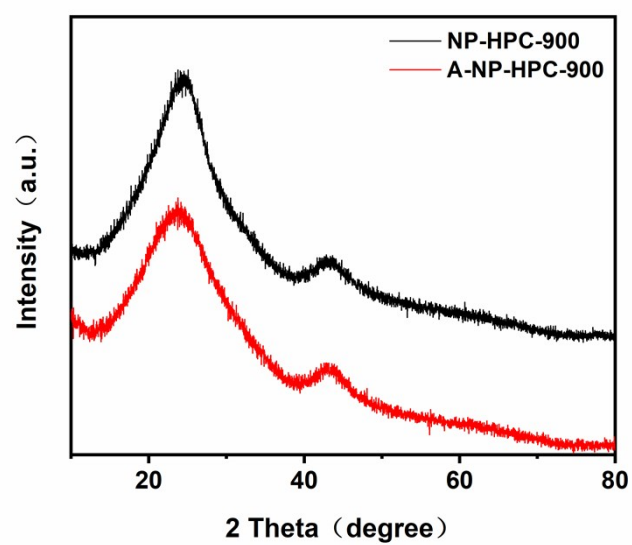

**Figure S9.** X-ray diffraction patterns of NP-HPC-900 and A-NP-HPC-900.

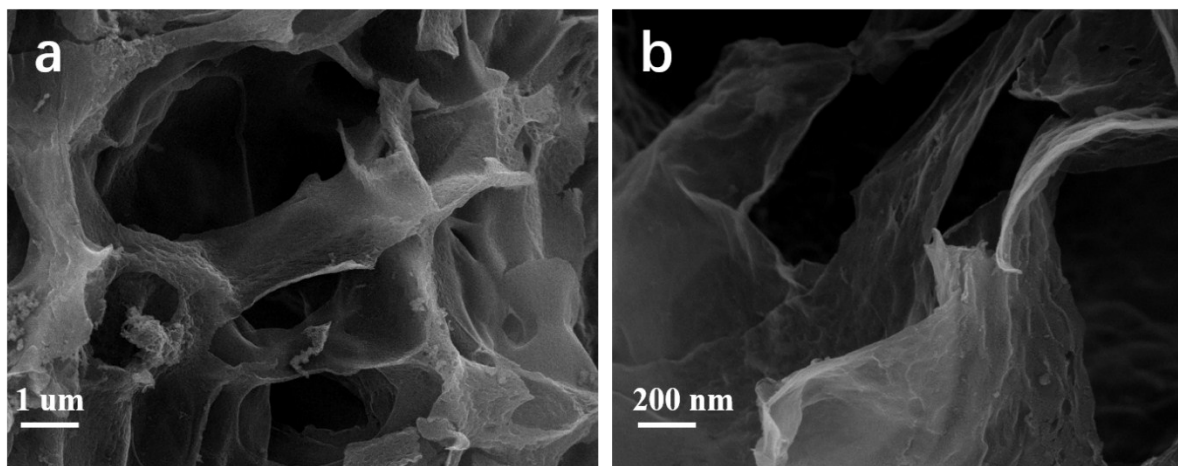

**Figure S10.** (a-b) SEM images of A-NP-HPC-900.

**a**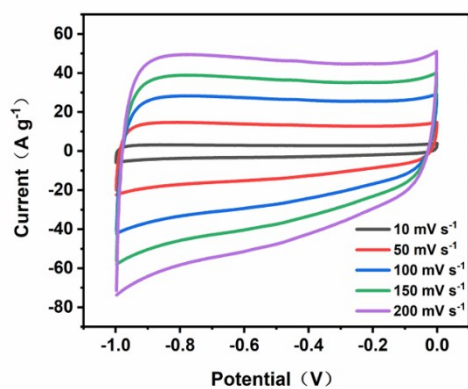**b**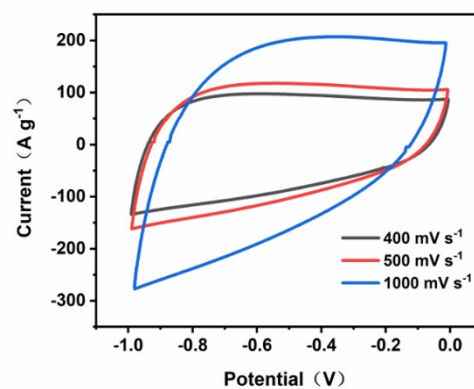

**Figure S11.** (a) CVs of NP-HPCN-900 electrode at a scan rate of 10-200 mV s<sup>-1</sup>. (b) CVs of NP-HPCN-900 electrode at a scan rate of 400-1000 mV s<sup>-1</sup>.

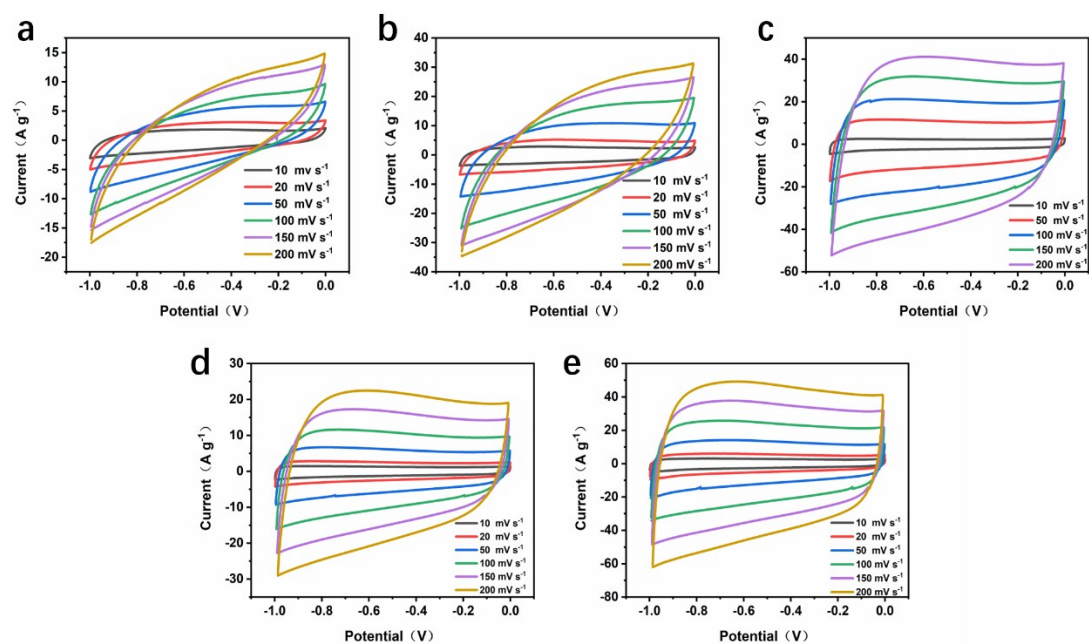

**Figure S12.** CVs at a scan rate of  $10\text{--}200 \text{ mV s}^{-1}$  (a) NP-HPCN-700. (b) NP-HPCN-800. (c) NP-HPCN-1000. (d) NP-HPC-900 and (e) A-NP-HPC-900.

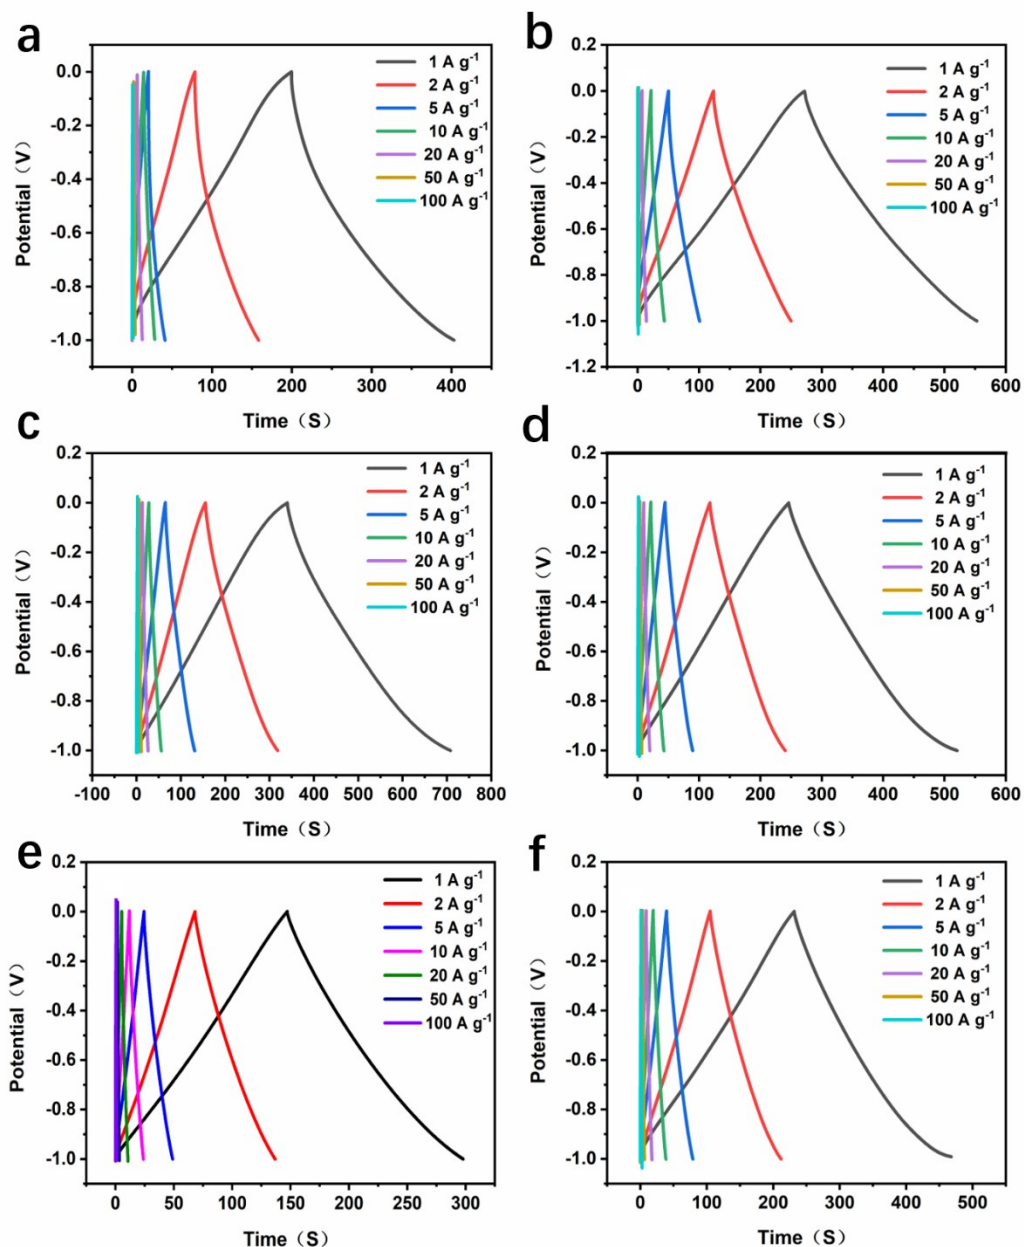

**Figure S13.** GCD curves at current densities of 1 to 100 A g<sup>-1</sup> (a) NP-HPCN-700. (b) NP-HPCN-800. (c) NP-HPCN-900. (d) NP-HPCN-1000. (e) NP-HPC-900 and (f) A-NP-HPC-900.

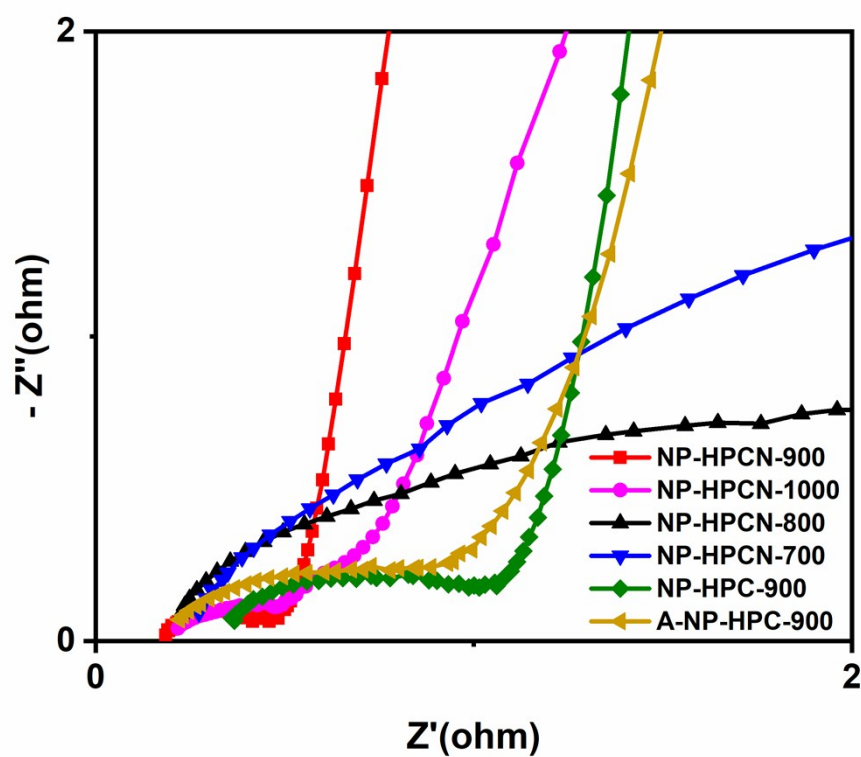

**Figure S14.** the Nyquist plots of the carbon specimens.

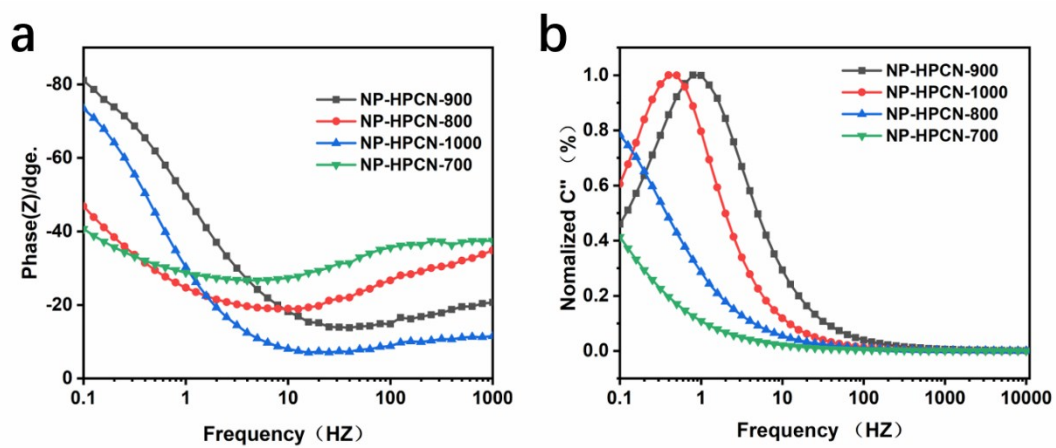

**Figure S15.** (a) the bode phase diagrams. (b) the normalized real and imaginary of carbon samples.

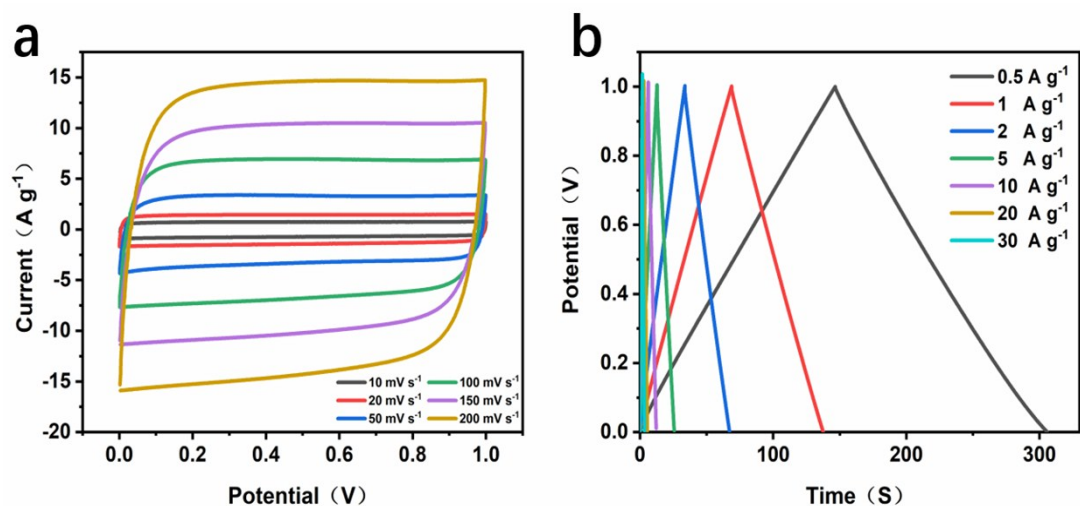

**Figure S16.** (a) CVs at a scan rate of 10-200  $\text{mV s}^{-1}$  of NP-HPCN-900-KOH with a cell voltage of 0-1 V. (b) GCD curves at current densities of NP-HPCN-900-KOH with a cell voltage of 0-1 V.

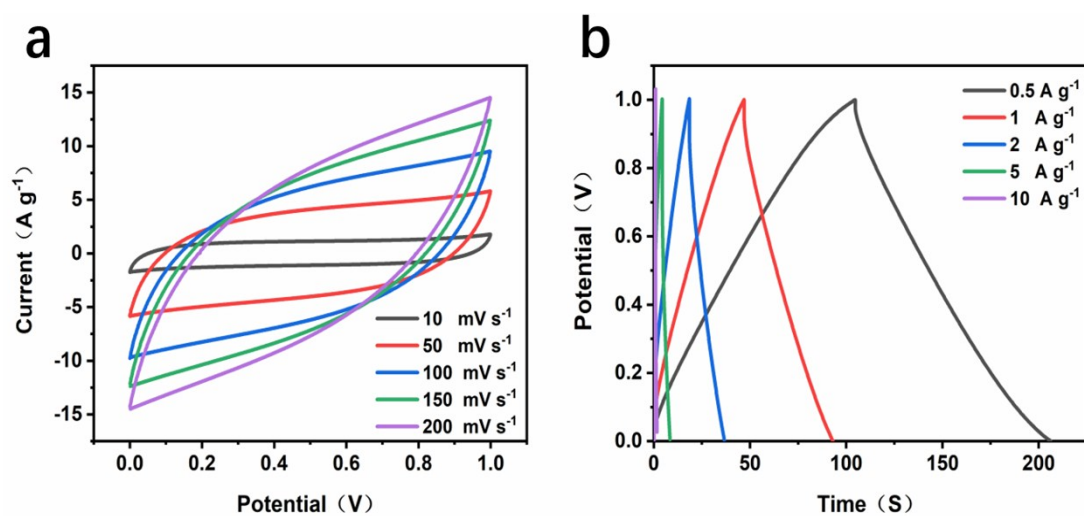

**Figure S17.** (a) CVs at a scan rate of 10-200  $\text{mV s}^{-1}$  of NP-HPCN-900-PVA/KOH with a cell voltage of 0-1 V. (b) GCD curves at current densities of NP-HPCN-900-PVA/KOH with a cell voltage of 0-1 V.



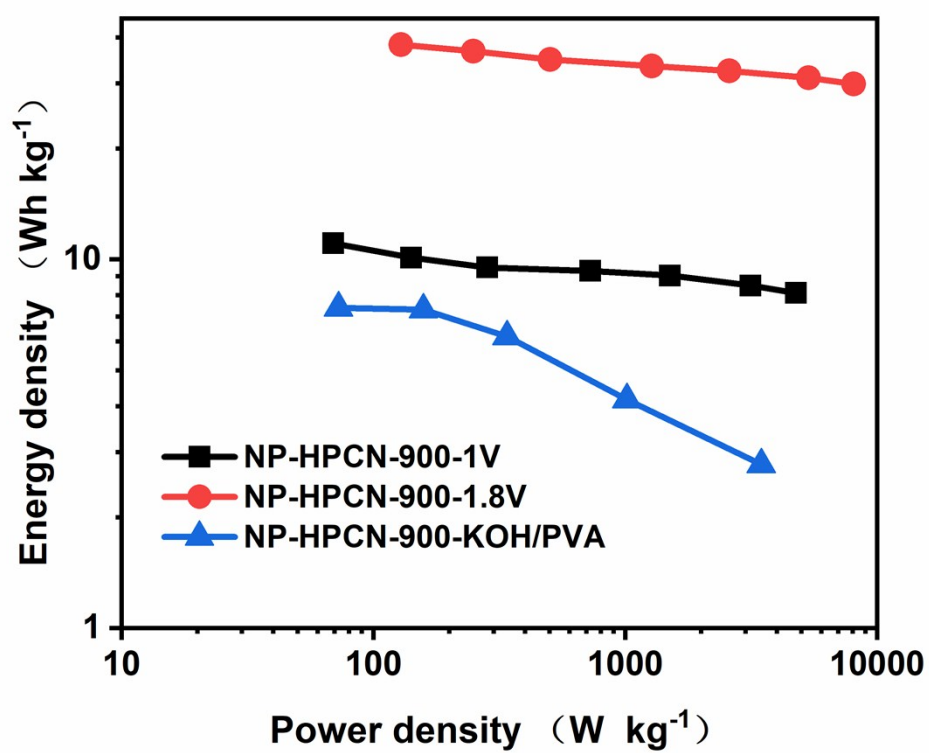

**Figure S18.** Ragone plot (energy density vs. power density) of the NP-HPCN-900 based symmetric device.

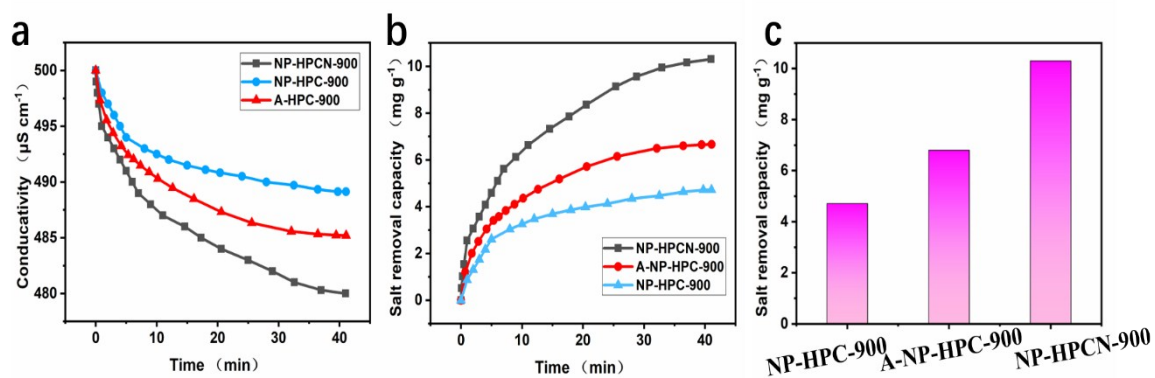

**Figure S19.** (a) Variation of solution conductivity vs. time. (b) The SAC curves. (c) The SAC histogram of NP-HPC-900, A-NP-HPC-900 and NP-HPCN-900.

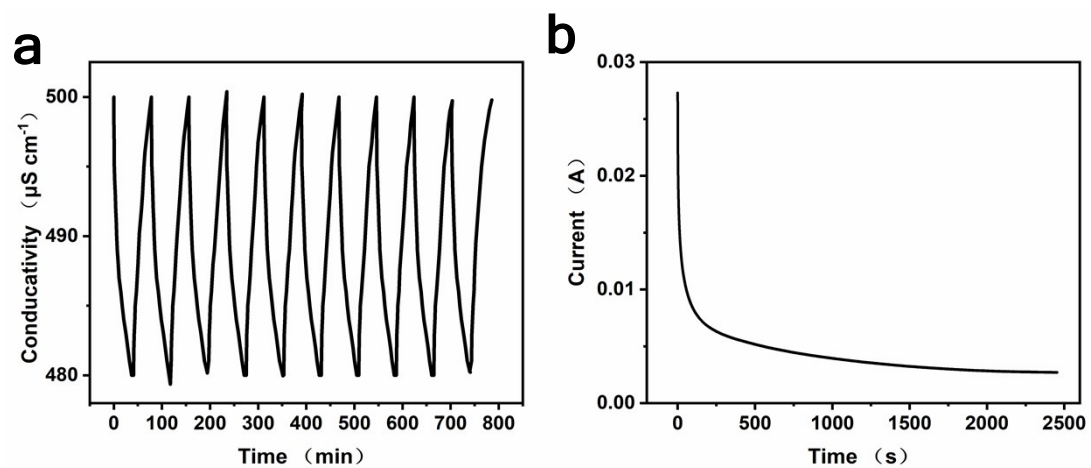

**Figure S20.** (a) Cycling stability of NP-HPCN-900 electrode. (b) Current response of NP-HPCN-900 electrode at 1.2 V.

## Theoretical Calculations

The spin-polarized density functional theory (DFT) calculations were all performed by using the plane wave basis set based Vienna ab initio simulation package (VASP). Perdew-Burke-Ernzerhof (PBE) functional was adopted to describe the interaction between electrons and the cutoff energy of 400 eV was adopted for plane wave basis set. All the atoms were allowed to relax until the residue forces on each atom were less

than 0.02 eV/Å. The graphene model used in our calculation consists of  $12.30 \times 29.83 \times 15.00$  Å<sup>3</sup>. The vacuum region was set larger than 15 Å in z direction to prevent the interaction between two adjacent surfaces. A  $3 \times 1 \times 1$  Monkhorst-Pack sampled k-points

in the irreducible Brillouin zone for structure optimization. All the configurations are built by Material studio (MS). The pyridinic-N doped single layer graphene was obtained by replacing the one carbon atom at the edge of the six-membered ring with nitrogen. And the N/P dual-doped single layer graphene was modelled by replacing the carbon atom connected between six-membered rings by phosphorus atom to form the P-C bond. These stable configurations are shown in Figure S18.

To evaluate the stability of Na and Cl adsorbed on graphene nanoribbons, we calculated the adsorption energy ( $E_{ads}$ ) of one Na<sup>+</sup> or Cl<sup>-</sup> on the surface as follows,

$$E_{ads} = E_{tot} - E_{surf} - E_{NaorCl}$$

$E_{tot}$  and  $E_{surf}$  are the total energies of graphene with and without potassium adsorption,

$E_{Na or Cl}$  is the energy for single Na or Cl involved its bulk structures.

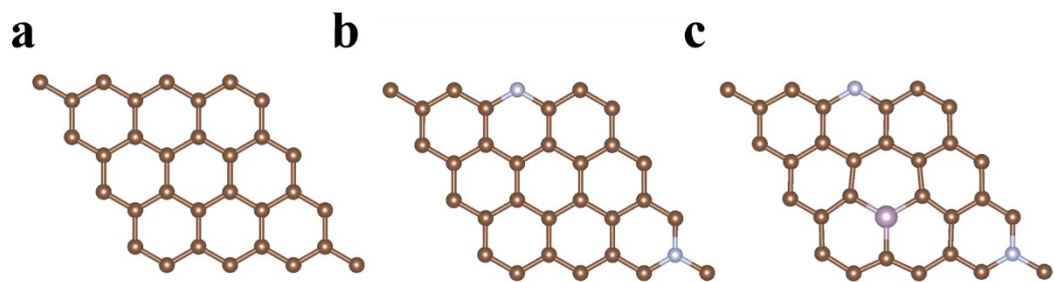

**Figure S21.** Top views of (a) single layer graphene. (b) N doped single layer graphene. (c) N/P dual-doped single layer graphene.

**Table S1** BET surface area and pore structure parameters of NP-HPCNs, NP-HPC-900 and A-NP-HPC-900 samples.

| Samples      | <sup>a)</sup> $S_{\text{BET}}$<br>( $\text{m}^2 \text{g}^{-1}$ ) | <sup>b)</sup> $S_{\text{micro}}$<br>( $\text{m}^2 \text{g}^{-1}$ ) | <sup>c)</sup> $S_{\text{meso}}$<br>( $\text{m}^2 \text{g}^{-1}$ ) | <sup>d)</sup> $S_{\text{macro}}$<br>( $\text{m}^2 \text{g}^{-1}$ ) | <sup>e)</sup> Mean pore<br>diameter (nm) | <sup>f)</sup> $V_{\text{t}}$<br>( $\text{cm}^3 \text{g}^{-1}$ ) | <sup>g)</sup> $V_{\text{micro}}$<br>( $\text{cm}^3 \text{g}^{-1}$ ) | <sup>h)</sup> $V_{\text{meso}}$<br>( $\text{cm}^3 \text{g}^{-1}$ ) | <sup>i)</sup> $V_{\text{macro}}$<br>( $\text{cm}^3 \text{g}^{-1}$ ) |
|--------------|------------------------------------------------------------------|--------------------------------------------------------------------|-------------------------------------------------------------------|--------------------------------------------------------------------|------------------------------------------|-----------------------------------------------------------------|---------------------------------------------------------------------|--------------------------------------------------------------------|---------------------------------------------------------------------|
| NP-HPCN-1000 | 1310                                                             | 849                                                                | 434                                                               | 27                                                                 | 4.46                                     | 1.46                                                            | 0.39                                                                | 0.92                                                               | 0.15                                                                |
| NP-HPCN-900  | 1679                                                             | 1053                                                               | 587                                                               | 39                                                                 | 4.31                                     | 1.81                                                            | 0.46                                                                | 1.13                                                               | 0.22                                                                |
| NP-HPCN-800  | 763                                                              | 544                                                                | 205                                                               | 14                                                                 | 3.30                                     | 0.63                                                            | 0.23                                                                | 0.32                                                               | 0.09                                                                |
| NP-HPCN-700  | 553                                                              | 454                                                                | 94                                                                | 5                                                                  | 2.68                                     | 0.37                                                            | 0.19                                                                | 0.15                                                               | 0.03                                                                |
| NP-HPC-900   | 402                                                              | 103                                                                | 280                                                               | 19                                                                 | 6.77                                     | 0.68                                                            | 0.05                                                                | 0.52                                                               | 0.11                                                                |
| A-NP-HPC-900 | 1541                                                             | 1056                                                               | 454                                                               | 31                                                                 | 4.05                                     | 1.56                                                            | 0.47                                                                | 0.93                                                               | 0.16                                                                |

<sup>a)</sup> Surface area calculated based on adsorption isotherms; <sup>b)</sup> t-plot micropore volume; <sup>c)</sup>  $S_{\text{meso}}$  calculated from BJH adsorption cumulative surface area; <sup>d)</sup>  $S_{\text{macro}}$  was acquired by subtracting  $S_{\text{micro}}$  and  $S_{\text{meso}}$  from  $S_{\text{BET}}$ ; <sup>e)</sup>  $4V/A$  by BET; <sup>f)</sup> total pore volume at  $p/p_0 = 0.995$ ; <sup>g)</sup> t-plot micropore volume; <sup>h)</sup> BJH adsorption cumulative volume; <sup>i)</sup>  $V_{\text{macro}}$  was acquired by subtracting  $V_{\text{micro}}$  and  $V_{\text{meso}}$  from  $V_{\text{t}}$ .

**Table S2** Chemical compositions of as-prepared samples calculated from XPS results.

| Samples      | at.% C | at.% O | at.% N | at.% P |
|--------------|--------|--------|--------|--------|
| NP-HPCN-700  | 71.78  | 16.50  | 9.41   | 2.31   |
| NP-HPCN-800  | 74.34  | 14.76  | 8.55   | 2.35   |
| NP-HPCN-900  | 87.01  | 7.55   | 4.20   | 1.24   |
| NP-HPCN-1000 | 92.07  | 5.04   | 2.10   | 0.79   |
| NP-HPC-900   | 88.66  | 6.32   | 3.82   | 1.20   |

Table S3 comparison of salt adsorption capacity between NP-HPCN-900 and previous literatures.

| Sample                                              | Voltage (V) | Initial Concentration<br>(mg/L) | Salt adsorption capacity<br>(mg/g) | Ref.      |
|-----------------------------------------------------|-------------|---------------------------------|------------------------------------|-----------|
| 3D Channel-structured graphene                      | 1.5         | 295                             | 9.60                               | 1         |
| Carbon spheres with hierarchical<br>micro/mesopores | 1.2         | 500                             | 15.8                               | 2         |
| Porous carbon polyhedra                             | 1.2         | 500                             | 13.8                               | 3         |
| Porous carbon spheres                               | 1.2         | 500                             | 5.81                               | 4         |
| GN/hierarchically porous carbon                     | 1.2         | 500                             | 6.18                               | 5         |
| CHS1                                                | 1.6         | 250                             | 18.8                               | 6         |
| Biomass-derived porous carbon                       | 1.5         | 500                             | 16                                 | 7         |
| Nafion-AC                                           | 1.2         | 500                             | 10.8                               | 8         |
| NP-HPCN-900                                         | 1.2         | 250                             | 10.3                               | This work |
| NP-HPCN-900                                         | 1.4         | 250                             | 18.1                               | This work |

### Reference:

- 1 L. Chang, Y. H. Hu, *J. Colloid Interface Sci.*, 2019, **538**, 420-425.
- 2 X. Xu, H. Tang, M. Wang, Y. Liu, *J. Mater. Chem. A*, 2016, 4, 16094-16100.
- 3 Y. Liu, X. Xu, M. Wang, T. Lu, Z. Sun, L. Pan, *Chem Commun.*, 2015, 51, 12020-12023.
- 4 Y. Liu, L. Pan, T. Chen, X. Xu, T. Lu, Z. Sun, D. H. C. Chua, *Electrochimica Acta*, 2015, 151, 489-496.
- 5 X. Wen, D. Zhang, T. Yan, J. Zhang and L. Shi, *J. Mater. Chem. A*, 2013, 1, 12334-12344.
- 6 Z. Y. Leong, H. Y. Yang, *RSC Advances*, 2016, 6, 53542-53549.
- 7 Z. Xie, X. Shang, J. Yan, T. Hussain, P. Nie, J. Liu, *Electrochim. Acta*, 2018, **290**, 666-675.
- 8 W. Cai, J. Yan, T. Hussain, J. Liu, *Electrochim. Acta*, 2017, **225**, 407-415.
